# Supplementary material
Source: PubMed Central journal article supplement (PMC6362618)
Supplement: ASN.2018090901SupplementaryData1.pdf [file ASN.2018090901SupplementaryData1.pdf]

## Supplement Table of Contents:

Materials and Methods Supplement.

Supplement Figure 1. IL-34 and CSF-1 are expressed with advancing lupus nephritis in MRL-*Fas*<sup>lpr</sup> mice

Supplement Figure 2. Submandibular inflammation (sialadenitis) is suppressed in IL-34 KO MRL- *Fas*<sup>lpr</sup> mice.

Supplement Figure 3. Mø, T and B cell accumulation is suppressed in IL-34 KO MRL- *Fas*<sup>lpr</sup> mice.

Supplement Figure 4. CSF-1 does not compensate for the absence of IL-34 in the kidney of IL-34 KO MRL- *Fas*<sup>lpr</sup> mice.

Supplement Figure 5. Mø skew towards cyto-destructive M1 phenotype during lupus nephritis in MRL- *Fas*<sup>lpr</sup> mice and in BM Mø co-cultured with hypoxic TEC.

Supplement Figure 6. Proliferating B cells are suppressed in IL-34 KO MRL-*Fas*<sup>lpr</sup> mice with lupus nephritis.

Supplement Figure 7. IL-34 correlates with Mø and T cells and histopathology disease activity in type II-IV lupus nephritis

Supplement Table 1. Study cohort demographic and clinical characteristics.

Supplement Table 2. Antibodies used for immunostaining.

Supplement Table 3. qPCR primers used to detect mRNAs.

Supplement Table 4. Antibodies used for FACS.

## **Supplement Materials and Methods**

### **Skin Lesions**

We scored the skin lesions by gross pathology using a grade of 0–3 (0 = none; 1 = mild (snout and ears); 2 = moderate, < 2 cm (snout, ears, and intrascapular); 3 = severe, 2–4 cm (snout, ears, and intrascapular); and 4 = very severe, >4 cm (snout, ears, and intrascapular). Moreover, we assessed the incidence of skin lesions that showed grade 2 or more.

### **$\beta$ -Galactosidase**

Kidneys were fixed in 4% paraformaldehyde for 3 hours at 4°C, embedded and sectioned at 20- $\mu$ m thick sections. Cryosections were stained with X-gal (Cat. X4281C10; Gold Biotechnology) overnight at 37°C and subsequently counterstained with Nuclear Fast Red (Cat. N3020; Sigma-Aldrich). We scored expression in tubules on a scale of 0–4 (0 = none; 1 = weak; 2 = moderate; 3 = strong; 4 = very strong) under x40 magnification in at least 20 high power fields per section.

### **Histopathology**

#### Kidney

Kidneys were fixed in 10% neutral buffered formalin, embedded in paraffin, sectioned (4  $\mu$ m), and stained with PAS. To score kidney pathology we evaluated glomerular, tubulo-interstitial and perivascular pathology as follows. Glomerular pathology was assessed by examining 20 glomerular cross-sections (gcs) per kidney and scoring each glomerulus on a semiquantitative scale: 0 = normal (35–40 cells/gcs); 1 = mild (glomeruli with few lesions showing slight proliferative changes, mild hypercellularity (41–50 cells/gcs), and/or minor exudation; 2 = moderate (glomeruli with moderate hypercellularity (51–60 cells/gcs), including

segmental and/or diffuse proliferative changes, hyalinosis, and moderate exudates); and 3 = severe (glomeruli with segmental or global sclerosis and/or severe hypercellularity (>60 cells/gcs), necrosis, crescent formation, and heavy exudation). Tubulo-Interstitial pathology was assessed in 10 randomly selected high power fields (>400) on a scale of 0–3 according to the number of infiltrates and damaged tubules: 0 = normal, 1 = mild, 2 = moderate, and 3 = maximum. Perivascular cell accumulation was determined semi-quantitatively by scoring the number of cell layers surrounding the majority of vessel walls (score: 0 = none; 1 = < 5; 2 = 5–10; and 3 = >10).

### Salivary Gland

The salivary glands were fixed in 10% neutral buffered formalin. Paraffin sections (4 µm) were stained with H&E and pathology was evaluated. We scored the salivary gland inflammation on a scale of 0–3 (0 = no inflammatory cells); 1 = few perivascular and periductal inflammatory infiltrates (<100 cells); 2 = moderate number of perivascular and periductal inflammatory infiltrates (100–500 cells); 3 = extensive inflammation with large inflammatory foci (>500 cells).

## **Renal Function**

### Albuminuria

To quantify albuminuria levels, we analyzed 20 µl of urine collected over 8 hours by SDS-PAGE. Briefly, bovine serum albumin standards (0.25, 0.5, 1.0, 2.5, and 5.0 µg) were run on the same gel and used to identify and quantify urinary albumin bands. Gels were stained with Coomassie blue, the bands were captured and quantified using ChemiDoc MP imaging system (Bio-Rad). The values of the sample bands were translated into albumin concentrations using the standard curve, which were extrapolated to the 8-hour total urine volume.

## BUN

BUN levels were evaluated using a colorimetric analysis kit (Urea Nitrogen kit; Sigma-Aldrich, St. Louis, MO) according to manufacturer's instructions. A standard curve was generated and used to determine the concentration of urea nitrogen in the serum samples, collected at the time of sacrifice.

## Serum Creatinine

Serum creatinine concentration was measured using an autoanalyzer (Beckman Instruments, Inc., Fullerton, CA) according to manufacturer's instructions.

## **Immunofluorescence**

To determine IgG and C3 deposits in the glomeruli, we incubated cryostat sectioned tissue with 10% normal goat serum, followed by FITC-conjugated goat anti-mouse IgG and FITC-conjugated goat IgG fraction of mouse C3 (Cappel Laboratory, Malvern, PA). The fluorescence intensity within the peripheral glomerular capillary walls and mesangium were scored on a scale of 0-3 (0 = none; 1 = weak; 2 = moderate; 3 = strong) in at least 10 glomeruli per section.

To determine the number of intra-renal proliferating M $\phi$ , cryostat sectioned tissues were stained with anti-mouse F4/80 Ab (clone BM-8, Invitrogen, Carlsbad, CA), and anti-mouse Ki-67 Ab (clone SP6, Vector Laboratories, Burlingame, CA), followed by Cy3-conjugated goat anti-rat IgG Ab (clone polyclonal, Jackson ImmunoResearch, West Grove, PA) and FITC-conjugated goat anti-rabbit IgG Ab (clone polyclonal, Jackson ImmunoResearch, West Grove, PA). We enumerated the number of F4/80+/Ki-67+ cells in 10 HPF.

## **Immunoperoxidase**

Mouse: We stained frozen kidney sections, fixed in 25% ethanol/75%acetone for 10 min at room temperature, and blocked endogenous peroxidase activity and nonspecific binding of avidin and biotin. We detected the presence of Mø, T cell, double negative T cells, and apoptotic cells in TEC using the antibodies listed in Supplement Table 2. Optimal concentrations of primary Abs were diluted in Ab dilution buffer and incubated with the tissue sections overnight in a humidified chamber at 4°C. We incubated tissue sections with biotinylated anti-rat IgG Ab (BA-4001; Vector Laboratory, Burlingame, CA) for 1 h at room temperature, followed by incubation with ABC complex (PK-6100; Vector Laboratories) for 1 h at room temperature. Then, the stain was developed using DAB (SK-4100; Vector Laboratories), followed by counterstain with Mayer's Hematoxylin (Sigma-Aldrich, St. Louis, MO). Immunostaining was analyzed by counting for the presence of F4/80, CD4, B220, and caspase-3-positive cells in 20 randomly selected HPF.

Human: Kidney formalin fixed tissue sections obtained from human kidney biopsy specimens were stained for the presence of IL-34, CSF-1, cFMS, PTPRZ, Mø (CD68), and T cells (CD3). Antibodies used for immunostaining are listed in Supplement Table 2. Antigens were retrieved by immersion in citrate buffer followed by blocking of endogenous peroxidase activity and nonspecific binding of avidin and biotin. We incubated kidney sections with a primary antibody and detected the primary antibody by incubation with biotinylated rabbit anti-goat antibody or goat anti-rabbit antibody or goat anti-mouse antibody, followed by development with 3-3-diaminobenzidine (Vector Laboratories; Burlingame, CA). Immunostaining was analyzed by counting for the presence of positive cells in 10 randomly selected HPF.

## **ELISA**

Total IgG: Plates were coated overnight at 4°C with goat anti-mouse Ig capture Ab (Southern Biotechnology, Cat. 1010-01) in PBS. The wells were washed 3 times and blocked for 1 h with 1% BSA in PBS. We added Ig standards (mouse IgG-UNLB, Southern Biotechnology, cat. 0107-01) to the plate using a series of 2-fold dilutions, and assessed serum samples at 1/10000 dilution. Standards and serum samples were incubated 2 h at RT, and bound Ig was detected with goat anti-mouse detection Ab conjugated with HRP (Southern Biotechnology, cat.1030-05) and TMB solution (Zymed, cat. 0020-23). The absorbance was measured at 450 nm.

dsDNA: Immunolon (Dynex, cat. 3355) plates were coated for 1h at RT with 2 µg/mL of dsDNA (calf thymus DNA, Sigma) in PBS. To get dsDNA, 400 µL of 0.5 mg/mL thymus DNA was treated with 5 µL of 40 U/µL Mung Bean Nuclease (Amershan cat. E2420Y) for 1 min at 37°C. The wells were blocked for 1 h at RT with 1% BSA 0.1% Tween 10% in PBS. We added serum 100 µL/well , 1h at RT (dilutions 1:50 to 1:2000). Bound IgG was detected with goat anti-mouse detection Ab conjugated with HRP (Southern Biotechnology, cat.1030-05) and TMB solution (Zymed, cat. 0020-23). The absorbance was measured at 450 nm.

CSF-1: The tissues used for homogenates were from mice perfused with PBS through the heart to flush out CSF-1 in the circulation. Briefly, we homogenized frozen tissue samples in ELISA-lysis buffer (20 mM Tris-Hcl pH 7.5 , 150 mM NaCl, 1% NP-40, with proteinase inhibitors from Sigma) using a homogenizer. Samples were spun down and the supernatant fraction of the homogenates was used for the ELISA. We determined the protein concentration of each sample (supernatant of homogenate) using the BCA Protein Assay Kit (PIERCE, Rockford, IL) and evaluated 200 µg of protein per tissue sample. The ELISA

Capture (Cat. 552513), detection (cat. 552514) antibodies and reagents were purchased from BD Bioscience (San Jose, CA).

IL-34: Plates were coated for 24 h with 0.5 µg/mL of the capture Ab (R&D, Cat. AF5195), blocked with 1% BSA in PBS at RT for 1.5 h and serum samples were added undiluted and incubated at 4°C overnight. Detection Ab (BioLegend, cat. 519303) is prepared in 1 % BSA 0.05 % Tween-20 in PBS and incubated at RT for 1 h. Bound Ab was detected with a Strep-HRP Ab and TMB solution (Zymed, cat. 0020-23). The absorbance was measured at 450 nm.

### **Leukocyte isolation whole blood (human)**

B cells (CD19+; Miltenyi, Cat. 130-050-301)), T cells (CD3+; Miltenyi, Cat. 130-050-101)) and monocytes (CD14+; Miltenyi, Cat. 130-050-201)) (Miltenyi Biotec) were isolated from whole blood. Cells subsets were separated using the magnetic cell isolation and cell separation system from Miltenyi Biotec following the manufactures instructions. We used the following Abs for detection: rabbit anti-human IL34, dilution 1:1000 (Origene/Acris), rabbit anti-human PTPRZ, dilution 1:200, goat anti-human M-CSF, dilution 1:200, rabbit anti-cFMS, dilution 1:200 (Santa Cruz), GAPDH, dilution 1:5000 (Cell signaling), anti-goat HRP and anti-rabbit HRP, dilution 1:10000 (Santa Cruz).

### **qPCR**

qPCR was performed using real-time, 2-step, quantitative PCR. Total RNA was isolated from snap-frozen whole kidney, primary TECs, and BMMØ using TRIzol (Life Technologies, Gaithersburg, MD). The RT reaction was performed on 100 µg of RNA using an oligo (dT) primer and Superscript II reverse transcriptase (Life Technologies). Relative quantitation with real-time two-step RT-PCR was performed with SYBR Green PCR reagents (Qiagen,



Valencia, CA) and an ABI PRISM 7700 sequence detection system (PE Applied Biosystems, Foster City, CA) according to the manufacturer's instructions. Reactions were performed using 1.0  $\mu$ l of cDNA at a concentration of 100 ng/ml in a reaction volume of 25  $\mu$ l. The PCR consists of HotStar *Taq* activation for 10 min at 95°C, followed by 40 cycles with heating to 95°C for 15 s and cooling to 60°C for 1 min. The mRNA levels were normalized to those of GAPDH. The data were analyzed by the  $\Delta\Delta$ -CT method. Primers are listed in Supplement Table 3.

### **SLE Patient's Disease Activity**

Disease activity was evaluated by the following standard clinical serological activity parameters: (complement 3 (C3c), complement 4 (C4), antinuclear antibodies (ANA), anti-double stranded DNA (dsDNA) antibodies and urine parameters: proteinuria (24h collection). The following standard values of serological activity markers were determined: C3 (0.9-1.8 g/l); C4 (0.1-0.4) by enzyme immunoassay; ANA (1:80-1:5120) by immunofluorescence; dsDNA (30 IU/ml - 200 IU/ml) by ELISA; creatinine (0.5-0.8 mg/dl) by isotope dilution mass spectrometry; proteinuria (<150 mg/24h) by immunoturbidimetric assay.

## Supplement Figure 1

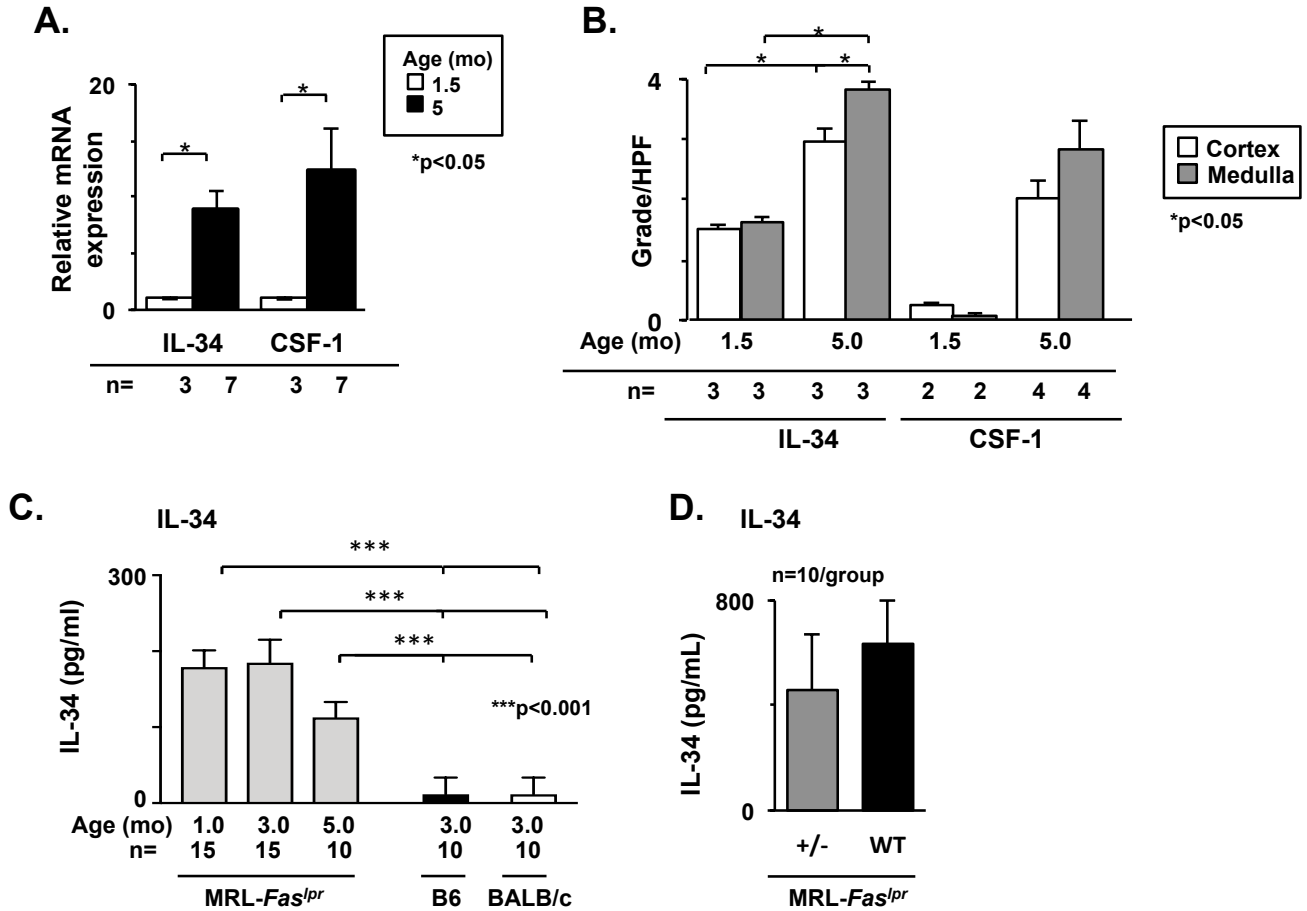

**Supplement Figure 1. IL-34 and CSF-1 are expressed with advancing lupus nephritis in MRL-*Fas*<sup>lpr</sup> mice.** (A) IL-34 and CSF-1 transcript levels in MRL-*Fas*<sup>lpr</sup> WT kidneys by qPCR. Values were normalized to GAPDH transcripts and expressed as relative ratio. (B) IL-34 and CSF-1 expression in kidney of MRL-*Fas*<sup>lpr</sup> mice identified by reporter mouse (LacZ under control of IL-34 or CSF-1) stained for  $\beta$ -galactosidase activity (X-gal). Graph of X-gal intensity comparing the cortex and medulla. (C) IL-34 in serum of MRL-*Fas*<sup>lpr</sup> mice and B6 and BALB/c mice analyzed using an ELISA. (D) IL-34 in serum of IL-34 +/- and WT MRL-*Fas*<sup>lpr</sup> mice at 5 mo of age using a different ELISA than in C. IL-34 KO= 0. Data are mean  $\pm$  SEM. Mann-Whitney U test was used for statistical analysis.

## Supplement Figure 2.

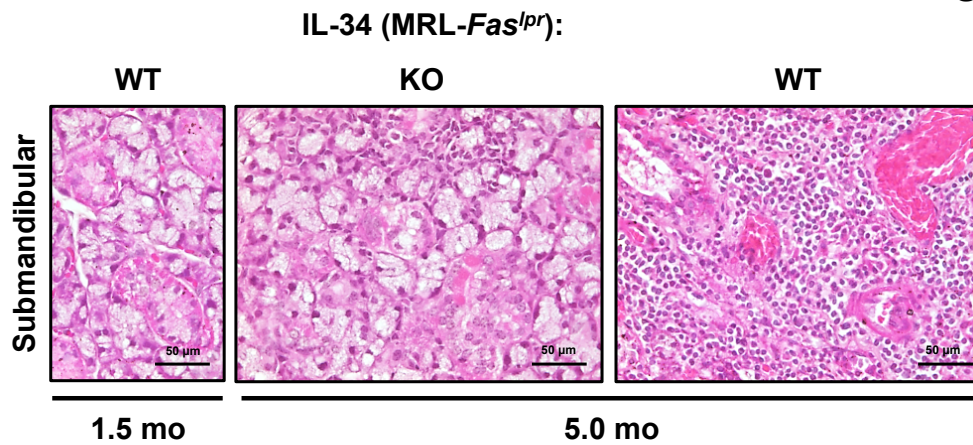

**Supplement Figure 2. Submandibular inflammation (sialadenitis) is suppressed in IL-34 KO MRL-*Fas*<sup>lpr</sup> mice.** We analyzed the submandibular gland at 1.5 and 5 mo age in IL-34 KO and WT MRL-*Fas*<sup>lpr</sup> mice. Representative photos (x 40) stained with H&E. Note the infiltrating cells in the WT, but not in the IL-34 KO mice. Data are mean  $\pm$  SEM. Mann-Whitney U test was used for statistical analysis.

### Supplement Figure 3

#### A. Glomerular (intra, peri)

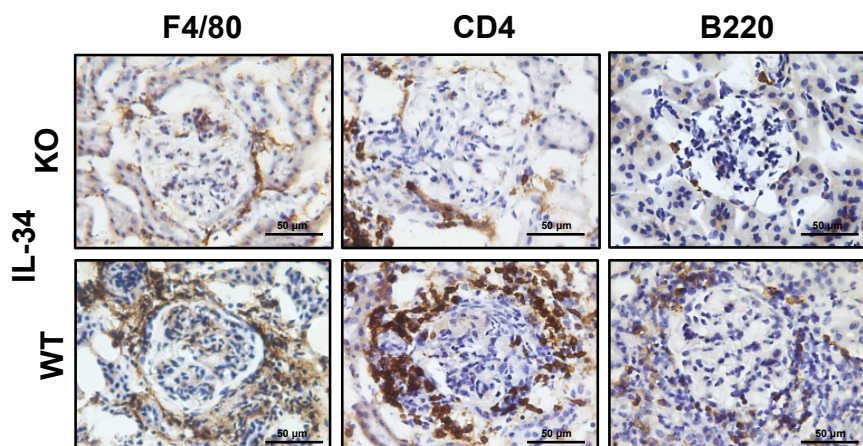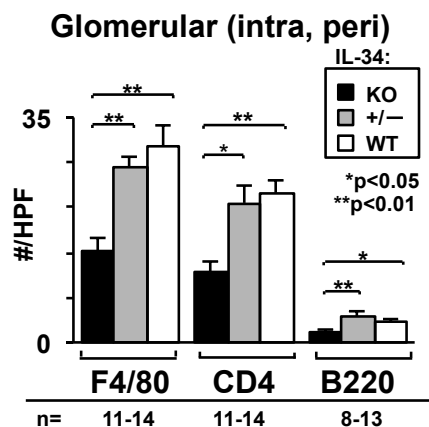

#### B. Tubulo-interstitial

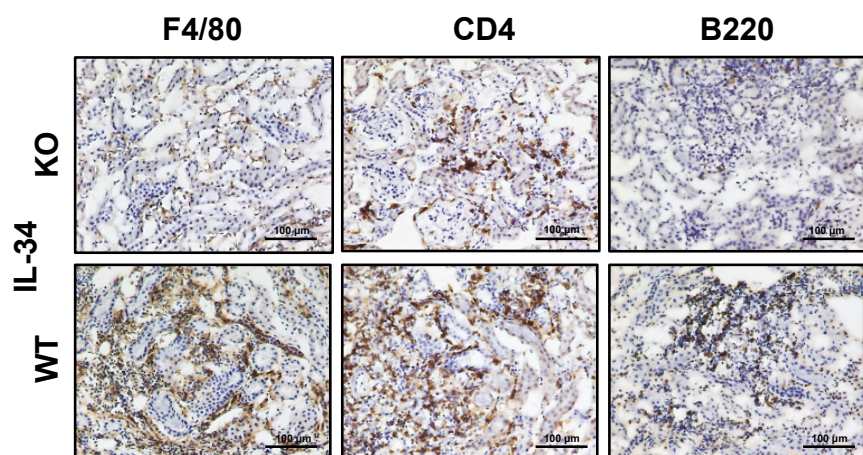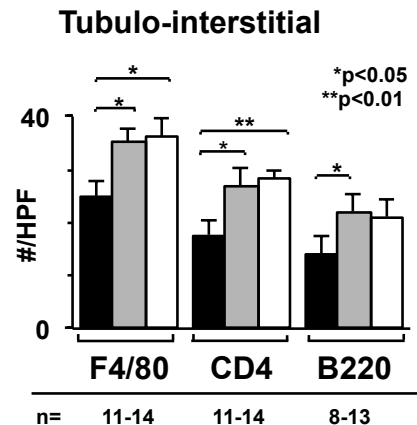

**Supplement Figure 3. Mø, T and B cell accumulation is suppressed in IL-34 KO MRL-*Fas*<sup>lpr</sup> mice.** The following were compared: IL-34 KO, WT and +/- MRL-*Fas*<sup>lpr</sup> mice (5 mo of age). Mø (F4/80), T cell (CD4), and CD4<sup>+</sup>CD8<sup>-</sup> T cell and B cells (B220) were identified by immunostaining in (A) Glomeruli: Representative photos (x 40) and (B) tubulo-interstitium (x20). Adjacent graphs show quantification of 10 randomly selected HPF. Data are mean ± SEM. Mann-Whitney U test was used for statistical analysis.

## Supplement Figure 4

### A. Kidney

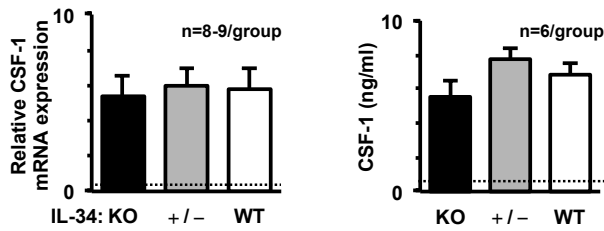

### B. Scheme

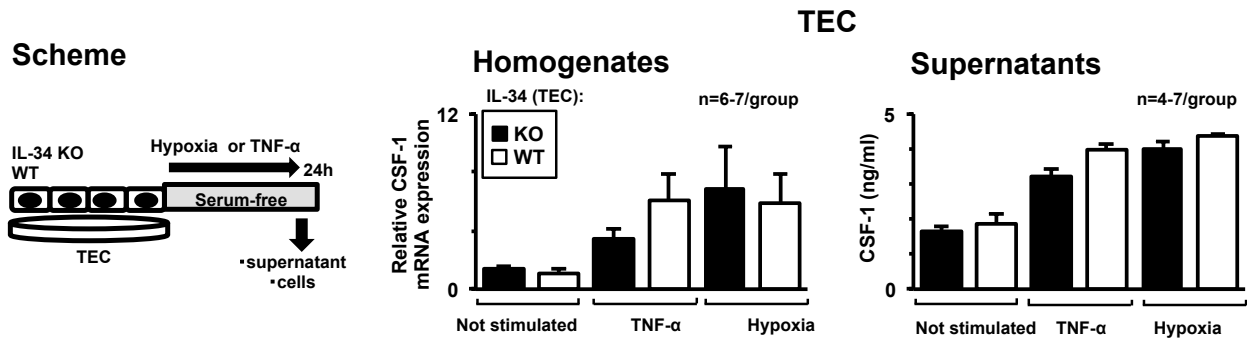

**Supplement Figure 4. CSF-1 does not compensate for the absence of IL-34 in the kidney of IL-34 KO MRL-Fas<sup>lpr</sup> mice.** (A) Intra-renal CSF-1 transcript and protein levels analyzed by qPCR and ELISA in IL-34 KO, WT and +/- MRL-Fas<sup>lpr</sup> mice (5 mo of age). Values are normalized to GAPDH transcript and expressed as relative quantification. Dotted lines are MRL-Fas<sup>lpr</sup> at 1.5 mo of age (n=3). (B) Scheme, *in vitro* analysis of CSF-1 generated by TEC. CSF-1 in TEC from IL-34 KO and WT MRL-Fas<sup>lpr</sup> mice analyzed by qPCR and ELISA, respectively. Data are mean ± SEM. Mann-Whitney U test was used for statistical analysis.

**A. In vivo (Kidney- MRL-*Fas*<sup>lpr</sup> at 5 mo of age)**

Cell number (Gated on CD45<sup>+</sup>CD11b<sup>+</sup>Ly6G-F4/80<sup>+</sup>)

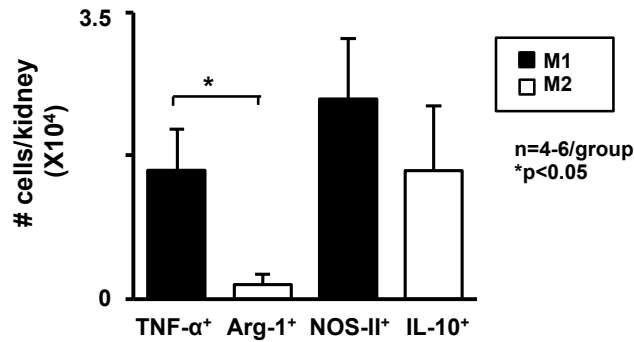

**B. In vitro (MRL-*Fas*<sup>lpr</sup> BM M $\phi$  co-cultured with hypoxic TEC)**

Cell number

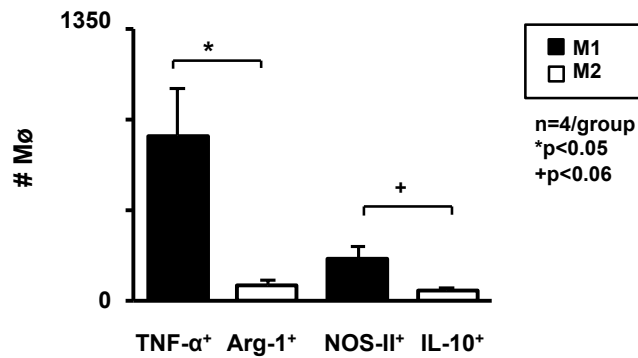

**C. Polarization in kidney (MRL-*Fas*<sup>lpr</sup> – 5 mo of age)**

1. Frequency (Gated on CD45<sup>+</sup>CD11b<sup>+</sup>Ly6G-F4/80<sup>+</sup>)

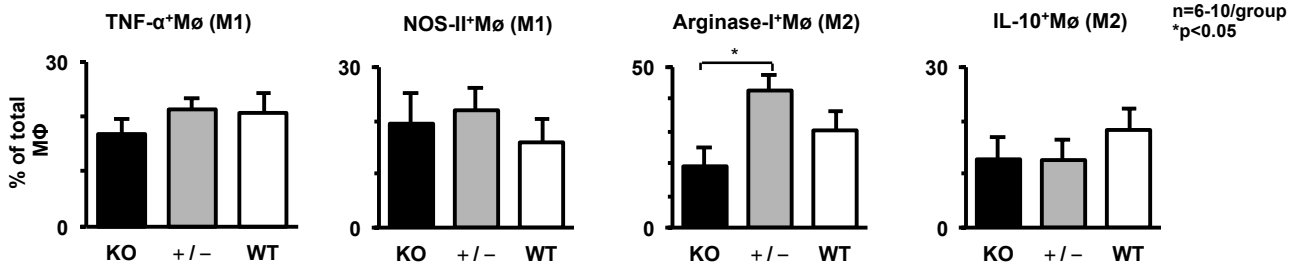

2. M1/M2 ratio

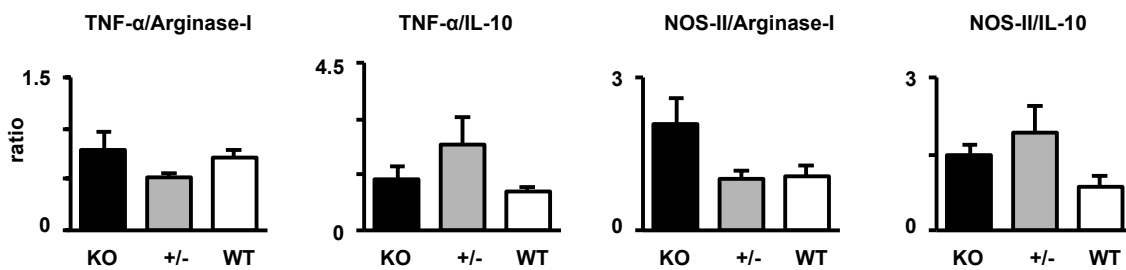

**Supplement Figure 5. Mø skew towards cyto-destructive M1 phenotype during lupus nephritis in MRL-*Fas*<sup>lpr</sup> mice and in BM Mø co-cultured with hypoxic TEC.** Quantified cyto-destructive (M1, TNF- $\alpha$ <sup>-</sup> NOS-II<sup>+</sup>) and cyto-protective (M2, Arg-1<sup>+</sup>IL-10<sup>+</sup>) Mø in (A) MRL-*Fas*<sup>lpr</sup> mice (5 mo of age) and in (B) BM Mø co-cultured with hypoxic TEC analyzed by FACS. (C) Mø polarization in MRL-*Fas*<sup>lpr</sup> kidney at 5 mo of age. 1. Frequency of M1 and M2 markers in IL-34 KO, WT and +/- MRL-*Fas*<sup>lpr</sup> kidney. 2. M1/M2 ratio in IL-34 KO, WT and +/- MRL-*Fas*<sup>lpr</sup> kidney. Data are mean  $\pm$  SEM. Mann-Whitney U test was used for statistical analysis.

**Kidney B cell proliferation**

**Immunostaining**

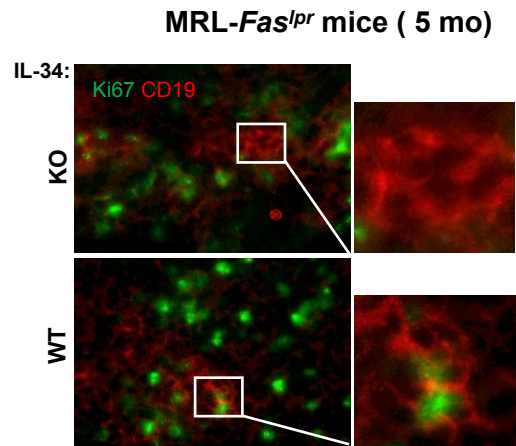

**Supplement Figure 6. Proliferating B cells are suppressed in IL-34 KO MRL-*Fas*<sup>lpr</sup> mice with lupus nephritis.** Representative photos of dual staining CD19 and Ki67 in IL-34 KO and WT MRL-*Fas*<sup>lpr</sup> kidney cryosections at 5 mo of age (x40, inset x160).



## A. IL-34 vs Mø &amp; T cells

## B. IL-34 vs pathology

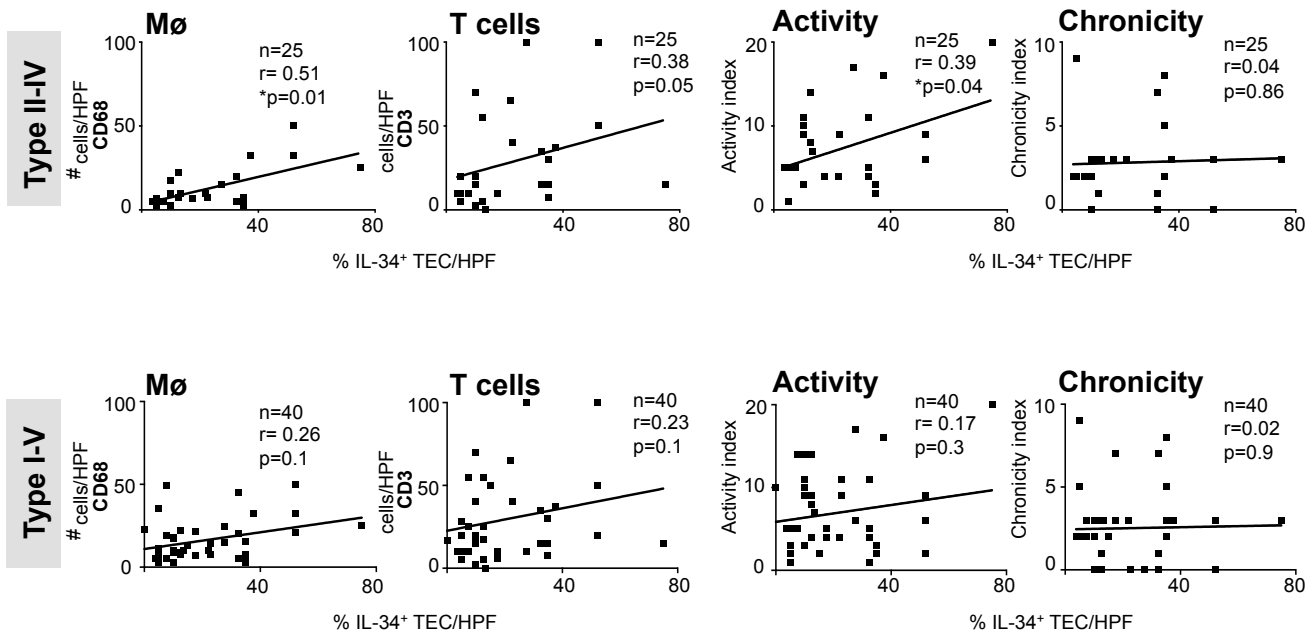

**Supplement Figure 7. IL-34 correlates with the number of Mø and T cells and histopathology disease activity in type II-IV lupus nephritis.** (A) Correlation of intra-renal Mø (CD68<sup>+</sup>) and T cells (CD3) with IL-34 in lupus nephritis in Type II-IV (n=25, corresponding demographic information in supplement Table 1) and Type I-V (n=40, corresponding demographic information in supplement Table 1). (B) Correlation of IL-34 with kidney histopathology activity and chronicity indices in lupus nephritis in Type II-IV and Type I-V. IL-34, CSF-1, CD68 and CD3 are detected in renal biopsy by immunostaining. Statistical analysis using Spearman Correlation Coefficient.

### Supplement Table 1. Study cohort demographic and clinical characteristics

|                                                       |        | LN<br>n=120  | Healthy control<br>n=62 | Biopsy-proven LN<br>n=25    | Healthy control<br>n=15 | Biopsy-proven LN<br>n=40  | SLE for WB*<br>n=3 | Healthy control WB<br>n=4 |
|-------------------------------------------------------|--------|--------------|-------------------------|-----------------------------|-------------------------|---------------------------|--------------------|---------------------------|
| Race                                                  | White  | 105          | 62                      | 23                          | 15                      | 35                        | 3                  | 4                         |
|                                                       | Asian  | 11           | 0                       | 1                           | 0                       | 3                         | 0                  | 0                         |
|                                                       | Others | 3            | 0                       | 1                           | 0                       | 2                         | 0                  | 0                         |
| Sex                                                   | Female | 109          | 51                      | 22                          | 10                      | 35                        | 3                  | 4                         |
|                                                       | Male   | 11           | 11                      | 3                           | 5                       | 5                         | 0                  | 0                         |
| Age (years) at study                                  | Mean   | 44.1±2.1     | 48.5±1.9                | 32.3±2.1                    | 40.7±3.7                | 34.1±2.7                  | 42.1±2.3           | 33.5±4.1                  |
|                                                       | Range  | 22-75        | 23-76                   | 17-69                       | 22-67                   | 17-69                     | 25-58              | 25-41                     |
| Age at SLE diagnosis (years)                          | Mean   | 32.9±2.2     |                         | 29.1±1.9                    |                         | 33.1±1.9                  | 29.1±1.7           |                           |
|                                                       | Range  | 12.1-72.3    |                         | 10.7-67.1                   |                         | 10.7-67.1                 | 18.1-43.4          |                           |
| Age at diagnosis of LN (years)                        | Mean   | 38.6±4.2     |                         | 32.3±2.1                    |                         | 34.1±2.7                  | 29.1±1.7           |                           |
|                                                       | Range  | 14.3-58.2    |                         | 17.5-69.3                   |                         | 17.5-69.8                 | 18.1-43.4          |                           |
| Disease duration at time of LN onset (years)          | Mean   | 9.1±1.9      |                         | 4.3±1.1                     |                         | 4.2±1.1                   | 0                  |                           |
|                                                       | Range  | 0-34.8       |                         | 0-30.2                      |                         | 0-30.2                    | 0                  |                           |
| Overall duration of SLE in this cohort (years)        | Mean   | 10.4±1.4     |                         | 8.7±1.1                     |                         | 9.2±1.2                   | 11±1.8             |                           |
|                                                       | Range  | 0.7-43.7     |                         | 0.8-25                      |                         | 0.8-25                    | 2.1-28.2           |                           |
| <b>Clinical parameter at the time of LN diagnosis</b> |        |              |                         |                             |                         |                           |                    |                           |
| Creatinine (mg/dl)                                    |        | 1.2±0.2      | 1.0±0.2                 | 1.4±0.1                     | 0.9±0.2                 | 1.6±0.3                   | 1.1±0.2            | 1.0±0.1                   |
| Proteinuria (24h collection) >0.5g                    | n      | 120          |                         | 25                          | 15                      | 38                        | 0                  |                           |
|                                                       | Mean   | 1.3±0.5      |                         | 2.7±0.4                     | 0.1±0.03                | 3.4±0.6                   | 0.4±0.4            |                           |
|                                                       | Range  | 0.2-14.5 g/d |                         | 0.4-14.5 g/d                | 0.01-0.4 g/d            | 0.4-14.5 g/d              | 0.4-1.2 g/d        |                           |
| ANA positive                                          | n      | 114          |                         | 25                          |                         | 25                        | 3                  |                           |
| anti-dsDNA positive                                   | n      | 101          |                         | 25                          |                         | 25                        | 3                  |                           |
| Depressed serum C3 level                              | n      | 78           |                         | 25                          |                         | 25                        | 2                  |                           |
|                                                       | Mean   | 0.67±0.6     |                         | 0.54±0.5                    |                         | 0.54±0.5                  | 0.74±0.5           |                           |
|                                                       | Range  | 0.2-1.4      |                         | 0.2-1.4                     |                         | 0.2-1.4                   | 0.4-1.5            |                           |
| <b>ISN/RPS class</b>                                  |        |              |                         |                             |                         |                           |                    |                           |
| Class I                                               | n      | 5            |                         | -                           |                         | 2                         | 1                  |                           |
| Class II                                              | n      | 12           |                         | 3                           |                         | 3                         | 1                  |                           |
| Class III                                             | n      | 13           |                         | 7                           |                         | 7                         | 1                  |                           |
| Class IV                                              | n      | 35           |                         | 15                          |                         | 15                        | 0                  |                           |
| Class V                                               | n      | 42           |                         | -                           |                         | 13                        | 0                  |                           |
| <b>Medication</b>                                     |        |              |                         |                             |                         |                           |                    |                           |
| Prednisolone dose (mg)                                | dose   | 3.8±0.7      |                         | 7.8±0.6                     |                         | 6.3±0.7                   | 5.4±0.4            |                           |
| Prednisolone                                          | n      | 102          |                         | 20                          |                         | 31                        | 3                  |                           |
| Mycophenolat mofetil                                  | n      | 35           |                         | 14                          |                         | 20                        | 2                  |                           |
| Cyclophosphamide (only as induction therapy)          | n      | 24           |                         | 13                          |                         | 13                        | 0                  |                           |
| Azathioprin                                           | n      | 32           |                         | 4                           |                         | 4                         | 0                  |                           |
| Hydroxychloroquin                                     | n      | 81           |                         | 20                          |                         | 32                        | 3                  |                           |
| Angiotensin-blocking agent                            | n      | 53           |                         | 14                          |                         | 26                        | 2                  |                           |
|                                                       |        |              |                         | includes only LN type II-IV |                         | includes only LN type I-V | *Western Blot (WB) |                           |

**Supplement Table 2. Antibodies used for immunostaining.**

| <b>Immunofluorescence</b>   |              |                 |                                      |
|-----------------------------|--------------|-----------------|--------------------------------------|
| <b>Antigen</b>              | <b>Clone</b> | <b>Cat. No.</b> | <b>Supplier</b>                      |
| IgG                         | 30-F11       | 55493           | Cappel                               |
| C3                          | 1A8          | 55500           | Cappel                               |
| Ki-67                       | SP6          | VP-RM04         | Vector Laboratories                  |
| CD19                        | 6D5          | 115508          | BioLegend                            |
| F4/80                       | BM-8         | MF48000         | Invitrogen                           |
| <b>Immunohistochemistry</b> |              |                 |                                      |
| <u>Mouse</u>                |              |                 |                                      |
| <b>Antigen</b>              | <b>Clone</b> | <b>Cat. No.</b> | <b>Supplier</b>                      |
| F4/80                       | BM-8         | MF48000         | Invitrogen                           |
| CD4                         | RM4-5        | 14-0042-85      | eBioscience                          |
| B220                        | RA3-6B2      | 14-0452-85      | eBioscience                          |
| Cleaved Caspase-3           | Polyclonal   | 9661            | Cell Signaling Technology            |
| CD3                         | SP7          | 16669-500       | Abcam                                |
| F4/80                       | Cl:A3-1      | MCAP 497        | Serotec                              |
| CD20                        | M-20         | Sc-7735         | Santa Cruz                           |
| <u>Human</u>                |              |                 |                                      |
| <b>Antigen</b>              | <b>Clone</b> | <b>Cat. No.</b> | <b>Supplier</b>                      |
| IL-34                       | C-19         | sc-243072       | Santa Cruz Biotechnology             |
| CSF-1                       | N-16         | sc-1324         | Santa Cruz Biotechnology             |
| c-FMS                       | C-20         | sc-692          | Santa Cruz Biotechnology             |
| PTPRZ                       | Polyclonal   | ab126497        | Abcam                                |
| CD68                        | PG-M1        | M0876           | Dako                                 |
| CD3                         | SP-7         | RM-9107-S1      | Neomarkers                           |
| CD19                        | Polyclonal   | ab99965         | abcam                                |
| <b>Western blot</b>         |              |                 |                                      |
| <u>Mouse</u>                |              |                 |                                      |
| <b>Antigen</b>              | <b>Clone</b> | <b>Cat. No.</b> | <b>Supplier</b>                      |
| PTPRZ                       | 3F8          | -               | Developmental Studies Hybridoma Bank |
| $\alpha$ -Tubulin           | TU-02        | sc8035          | Santa Cruz                           |
| ERK2:p42 MAPK               | Polyclonal   | 9108            | Cell Signaling                       |
| GAPDH                       | 0411         | sc-47724        | Santa Cruz                           |
| <u>Human</u>                |              |                 |                                      |
| <b>Antigen</b>              | <b>Clone</b> | <b>Cat. No.</b> | <b>Supplier</b>                      |
| PTPRZ                       | 122.2        | sc33664         | Santa Cruz                           |
| GAPDH                       | 14C10        | 2118            | Cell Signaling                       |
| $\beta$ -Actin              | 13E5         | 4970            | Cell Signaling                       |
| ERK: p44/42 MAPK            | Polyclonal   | 9102            | Cell Signaling                       |

### Supplement Table 3. qPCR primers to detect mRNAs.

| Gene                | Forward primer sequence            | Reverse primer sequence            |
|---------------------|------------------------------------|------------------------------------|
| <i>β-actin</i>      | 5'- GATTACTGCTCTGGCTCCTAGC -3'     | 5'-GACTCATCGTACTCCTGCTTG-3'        |
| <i>Bca-1/Cxcl13</i> | 5'- CTCTCCAGGCCACGGTATT -3'        | 5'- TAACCATTTGGCACGAGGAT -3'       |
| <i>Csf1</i>         | 5'- GGCTTGGCTTGGGATGATTCT -3'      | 5'- GAGGGTCTGGCAGGTACTC -3'        |
| <i>Fms</i>          | 5'- TGTCATCGAGCCTAGTGGC -3'        | 5'- CGGGAGATTCAGGGTCCAAG -3'       |
| <i>Gapdh</i>        | 5'-AGGTCGGTGTGAACGGATTTG-3'        | 5'- TGTAGACCATGTAGTTGAGGTCA -3'    |
| <i>lfn-γ</i>        | 5'- AGCTCTTCCTCATGGCTGTT -3'       | 5'- TTTTGCCAGTTCCTCCAGAT -3'       |
| <i>Il-1β</i>        | 5'- GCCTCGTGCTGTCCGACCCA -3'       | 5'- TGAGGCCCAAGGCCACAGGTAT -3'     |
| <i>Il-10</i>        | 5'-GCTCTTACTGACTGGCATGAG-3'        | 5'- CGCAGCTCTAGGAGCATGTG-3'        |
| <i>Il34</i>         | 5'- TTGCTGTAAACAAAGCCCCAT -3'      | 5'- CCGAGACAAAGGGTACACATTT -3'     |
| <i>Ip10/Cxcl10</i>  | 5'- TGAAATTATTCCTGCAAGCCAA -3'     | 5'- CAGACATCTCTTCTCACCCCTTCTTT -3' |
| <i>I-tac/Cxcl11</i> | 5'- AGTAACGGCTGCGACAAAGT -3'       | 5'- GCATGTTCCAAGACAGCAGA -3'       |
| <i>Mcp-1/Ccl2</i>   | 5'- GCTTGAGGTGGTTGTGGAAAA- 3'      | 5'- CTCACCTGCTGCTACTCATTC -3'      |
| <i>Mig/Cxc9</i>     | 5'- TCCTTTTGGGCATCATCTTC -3'       | 5'- TTCCCCCTCTTTTGCTTTTT -3'       |
| <i>Mip1a/Ccl3</i>   | 5'- TCTCCACCACTGCCCTTGCT -3'       | 5'- GGC GTGGAATCTTCCGGCTGT -3'     |
| <i>Ptprz1</i>       | 5'- GGAGTATCCAACAGTTCAGAGGC<br>-3' | 5'- AAGTCAGGGCAGACACGATCAC -3'     |
| <i>Rantes/Ccl5</i>  | 5'- TGCCAACCCAGAGAAGAAGT-3'        | 5'- AAGCTGGCTAGGACTAGAGCAA -3'     |
| <i>Tnf-α</i>        | 5'- CCCTCACACTCAGATCATCTTCT -3'    | 5'- GCTACGACGTGGGCTACAG -3'        |

**Supplement Table 4. Antibodies used for FACS.**

| <b>Antigen</b>                | <b>Clone</b> | <b>Fluorochrome</b>  | <b>Supplier</b>           |
|-------------------------------|--------------|----------------------|---------------------------|
| <b>CD45</b>                   | 30-F11       | Pacific blue         | BioLegend                 |
| <b>Ly6G</b>                   | 1A8          | APC-Cy7              | BioLegend                 |
| <b>CD11b</b>                  | M1/70        | Brilliant Violet 510 | BioLegend                 |
| <b>F4/80</b>                  | BM-8         | PE-Cy7               | BioLegend                 |
| <b>CD19</b>                   | 6D5          | APC                  | BioLegend                 |
| <b>CD3e</b>                   | 145.2C11     | PE                   | eBioscience               |
| <b>E-cadherin</b>             | DECMA-1      | Alexa-Fluor 647      | BioLegend                 |
| <b>Annexin-V</b>              | -            | APC                  | BioLegend                 |
| <b>Ki-67</b>                  | 16A8         | FITC                 | BioLegend                 |
| <b>IL-10</b>                  | JES5-16E3    | PE-Cy7               | BioLegend                 |
| <b>TNF<math>\alpha</math></b> | MP6-XT22     | PerCP/Cy5.5          | BioLegend                 |
| <b>iNOS</b>                   | CXNFT        | PE                   | eBioscience               |
| <b>Arginase-1</b>             | Polyclonal   | FITC                 | R&D Systems               |
| <b>CD86</b>                   | GL-1         | PE-Cy7               | BioLegend                 |
| <b>CD69</b>                   | H1.2F3       | APC-Cy7              | BioLegend                 |
| <b>CD23</b>                   | B3B4         | PE                   | eBioscience               |
| <b>BrdU</b>                   | Bu20a        | PE                   | BioLegend                 |
| <b>Cleaved Caspase-3</b>      | Asp175       | Unconjugated         | Cell Signaling Technology |
| <b>Rat IgG2a</b>              | RTK2758      | PE/Cy7               | BioLegend                 |
| <b>Rat IgG2b</b>              | 30-F11       | Pacific Blue         | BioLegend                 |
| <b>Rat IgG1</b>               | G0114F7      | PerCP/Cy5.5          | BioLegend                 |
| <b>Armenian Hamster IgG</b>   | HTK888       | PE                   | BioLegend                 |
| <b>Rat IgG2a</b>              | RTK2758      | PE                   | BioLegend                 |
| <b>Rat IgG2a</b>              | RTK2758      | APC/Cy7              | BioLegend                 |
| <b>Rat IgG2a</b>              | eBR2a        | APC                  | eBioscience               |
| <b>Rat IgG2a</b>              | RTK2758      | FITC                 | BioLegend                 |
| <b>Anti-rabbit IgG</b>        | Poly4064     | PE                   | BioLegend                 |
